# Supplementary material for: Facile separation of cyclic aliphatic and aromatic vapors using crystalline thiacalixarene assemblies with preorganized channels
Source: Royal Society of Chemistry journal article supplement (doi:10.1039/d2cc05647j), 2023-01-01
Supplement: d2cc05647j1.pdf [file d2cc05647j1.pdf]

Supporting Information for

**Facile separation of cyclic aliphatic and aromatic vapors  
using crystalline thiacalixarene assemblies with preorganized  
channels**

Manabu Yamada,<sup>\*a</sup> Ruka Yoshizaki,<sup>a</sup> Fumiya Uemura,<sup>a</sup> Hiroshi Katagiri,<sup>\*b</sup> Sumio Kato,<sup>a</sup>  
Kazuhiko Akimoto<sup>c</sup> and Fumio Hamada<sup>d</sup>

<sup>a</sup> Department of Materials Science, Graduate School of Engineering Science, Akita University, 1-1 Tegatagakuen-machi, Akita 010-8502, Japan

<sup>b</sup> Graduate School of Organic Materials Science, Yamagata University, 4-3-16, Jonan, Yonezawa, Yamagata 992-8510, Japan

<sup>c</sup> Nissan Chemical Industries, LTD, 6903-1 Ooaza-Onoda, Sanyo-Onoda, Yamaguchi 756-0093, Japan

<sup>d</sup> Emeritus Professor, Akita University, 1-1 Tegatagakuen-machi, Akita 010-8502, Japan

\*Corresponding authors.

Tel +81 18 889 3068; fax: +81 18 889 3068

E-mail address: myamada@gipc.akita-u.ac.jp (M.Y.)

Tel +81 238 26 3743; fax: +81 238 26 3743

E-mail address: kgri7078@yz.yamagata-u.ac.jp (H.K.)

# Table of Contents

## 1. Experimental Section

Materials

Methods

Solution  $^1\text{H}$  NMR

Powder X-ray diffraction

Growth of benzene included single crystals of **1**·methylcyclohexane (**1**·MeCyC<sub>6</sub>)

Growth of benzene included single crystals of **1**·benzene (**1**·Bz)

Growth of toluene included single crystals of **1**·Tol (**1**·Tol)

X-Ray Crystallography of **1**·Bz

X-Ray Crystallography of **1**·MeCyC<sub>6</sub> and **1**·Tol

Crystallographic Data

**Table S1.** Experimental single crystal X-ray data for **1**·MeCyC<sub>6</sub>, **1**·Bz, and **1**·Tol.

Vapor sorption measurement of the activated crystal **1a** toward cyclohexane, methylcyclohexane, benzene, and toluene

Thermogravimetric analysis (TGA)

Gas chromatography with the head-space method

Refinement of the Powder X-ray diffraction (PXRD) patterns for the **1a**-adsorbed MeCyC<sub>6</sub>, Bz, Tol, CyC<sub>6</sub>/Bz, and MeCyC<sub>6</sub>/Tol using Le Bail fitting

## 2. Supporting figures

**Fig. S1** Vapor sorption isotherms of **1a** at 25 °C in a) CyC<sub>6</sub>, b) Bz, c) MeCyC<sub>6</sub>, and d) Tol vapor. Solid symbols: sorption; open symbols: desorption.

**Fig. S2** Thermogravimetric analysis (TGA) of the **1a**-adsorbed CyC<sub>6</sub> (red line), MeCyC<sub>6</sub> (blue line), Bz (yellow dotted line), and Tol (green dotted line).

**Fig. S3** Vapor sorption experiments of the activated crystal **1a** for single or two components of cyclic aliphatics and aromatics in vials.

**Fig. S4** Head-space gas chromatography of the adsorption ratio (%) of a) CyC<sub>6</sub>/Bz or b) MeCyC<sub>6</sub>/Tol in **1a** exposed to a CyC<sub>6</sub>/Bz or MeCyC<sub>6</sub>/Tol mixed system at various compositions 1:4–1:0.25 (v/v) for 48 h

**Fig. S5**  $^1\text{H}$  NMR spectra of **1 $\alpha$**  incorporating CyC<sub>6</sub> and Bz after a) 0 h, b) 1 h, c) 2 h, d) 3 h, e) 6 h of air aging.

**Fig. S6**  $^1\text{H}$  NMR spectra of **1 $\alpha$**  incorporating MeCyC<sub>6</sub> and Tol after a) 0 h, b) 1 h, c) 2 h, d) 3 h, e) 6 h of air aging.

**Fig. S7** Preliminary data of head-space gas chromatograms of the remaining ratio of CyC<sub>6</sub> and Bz in **1 $\alpha$**  after a) 0 h, b) 1 h, c) 2 h, d) 3 h, and e) 6 h of air aging.

**Fig. S8** Preliminary data of head-space gas chromatograms of the remaining ratio of MeCyC<sub>6</sub> and Tol in **1 $\alpha$**  after a) 0 h, b) 1 h, c) 2 h, d) 3 h, and e) 6 h of air aging.

**Fig. S9** ORTEP diagram of **1**·MeCyC<sub>6</sub> with thermal ellipsoids at 50 % probability. Color code: bromine (purple), sulfur (yellow), oxygen (red), carbon (black), and hydrogen (light green).

**Fig. S10** ORTEP diagram of **1**·Bz with thermal ellipsoids at 50 % probability. Color code: bromine (purple), sulfur (yellow), oxygen (red), carbon (black), and hydrogen (light green).

**Fig. S11** ORTEP diagram of **1**·Tol with thermal ellipsoids at 50 % probability. Color code: bromine (purple), sulfur (yellow), oxygen (red), carbon (black), and hydrogen (light green).

**Fig. S12** Extended crystal structures of a) **1**·MeCyC<sub>6</sub>, b) **1**·Bz, and c) **1**·Tol. Color code: bromine (brown), sulfur (yellow), oxygen (red), carbon (dark gray), and hydrogen (light gray). Bz molecules are shown as space-filling models.

**Fig. S13**  $^1\text{H}$  NMR spectrum of the crystal **1**·Bz dissolved in chloroform-*d*<sub>1</sub> (CDCl<sub>3</sub>,  $\delta$  from TMS).

**Fig. S14**  $^1\text{H}$  NMR spectrum of the crystal a) **1**·MeCyC<sub>6</sub> and b) **1**·Tol dissolved in chloroform-*d*<sub>1</sub> (500 MHz, CDCl<sub>3</sub>,  $\delta$  from TMS).

**Fig. S15** Le Bail fit for the **1 $\alpha$** -adsorbed MeCyC<sub>6</sub> against the experimental powder X-ray diffraction (PXRD) pattern. The red crosses represent the experimental pattern, and the pale blue line represents the refined fit. The background (black), difference plot (blue), and Bragg position (green) are also displayed.

**Fig. S16** Le Bail fit for the **1 $\alpha$** -adsorbed Bz against the experimental powder X-ray diffraction (PXRD) pattern. The red crosses represent the experimental pattern, and the pale blue line represents the refined fit. The background (black), difference plot (blue), and Bragg position (green) are also displayed.

**Fig. S17** Le Bail fit for the **1 $\alpha$** -adsorbed Tol against the experimental powder X-ray diffraction pattern (PXRD) pattern. The red crosses represent displaying the experimental pattern, and the pale blue line represents the refined fit. The background (black), difference plot (blue), and Bragg position (green) are also displayed.

**Fig. S18** Le Bail fit for the **1 $\alpha$** -adsorbed CyC<sub>6</sub>/Bz against the experimental powder X-ray diffraction (PXRD) pattern. The red crosses represent the experimental pattern, and the pale blue line represents the refined fit. The background (black), difference plot (blue), and Bragg position (green) are also displayed.

**Fig. S19** Le Bail fit for the **1 $\alpha$** -adsorbed MeCyC<sub>6</sub>/Tol against the experimental powder X-ray diffraction (PXRD) pattern. The red crosses represent the experimental pattern, and the pale blue line represents the refined fit. The background (black), difference plot (blue), and Bragg position (green) are also displayed.

### 3. References

## 1. Experimental Section

### Materials

All solvents were purchased from commercial sources and used as received. The reactions were carried out in a nitrogen atmosphere. *p*-Bromothiacalix[4]arene propyl ether molecules as a 1,3-alternate conformer were also synthesized according to the literature.<sup>S1, S2</sup>

### Methods

#### Solution <sup>1</sup>H NMR

Solution <sup>1</sup>H NMR spectra were recorded at 500 MHz JEOL ECA500 instrument. Chemical shifts are quoted as parts per million (ppm) relative to tetramethylsilane (CDCl<sub>3</sub>).

#### Powder X-ray diffraction

Powder X-ray diffraction (PXRD) patterns were collected with a Rigaku Ultima IV diffractometer with Cu K $\alpha$  radiation ( $\lambda = 1.5406 \text{ \AA}$ , 40 kV, 40 mA) and a graphite monochromator at a step width of  $0.02^\circ 2\theta$  and a scan speed of  $2.000^\circ \text{ min}^{-1}$ .

#### Growth of methylcyclohexane included single crystals of 1·methylcyclohexane (1·MeCyC<sub>6</sub>)

200 mg of activated **1a** was dissolved in methylcyclohexane/CHCl<sub>3</sub> mixed solution in a vial. The resulting solutions were allowed to slowly evaporate at room temperature over several days to afford colorless large crystals. The resultant crystals were conducted for analysis of single-crystal diffraction, PXRD, and NMR studies.

#### Growth of benzene included single crystals of 1·benzene (1·Bz)

200 mg of activated **1a** was dissolved in benzene (Bz) in a vial. The resulting solutions were allowed to slowly evaporate at room temperature over several days to afford colorless large crystals. The resultant crystals were conducted for analysis of single-crystal diffraction, PXRD, and NMR studies.

#### **Growth of toluene included single crystals of 1·toluene (1·Tol)**

200 mg of activated **1a** was dissolved in 2 mL of toluene in a vial. The resulting solutions were allowed to slowly evaporate at room temperature over several days to afford colorless large crystals. The resultant crystals were conducted for analysis of single-crystal diffraction, PXRD, and NMR studies.

#### **X-ray crystallography of 1·Bz**

Single crystals of **1·Bz** suitable for single-crystal X-ray diffraction studies were formed. The crystals in the mother liquid were picked up with a pipette and dropped in paraton oil. The single crystals coated with oil were isolated on MicroMounts, and the crystals were immediately placed in a cold nitrogen stream. X-Ray diffraction data for **1·Bz** were collected on a Rigaku XtaLAB Synergy-DW with multi-layer mirror optics Cu K $\alpha$  radiation. The structures were solved by direct methods using SHELXT (Version 2015)<sup>S3</sup> and refined using the full-matrix least-squares method on  $F^2$  using the SHELXL (Version 2018)<sup>S4</sup> Program. All materials for publication were prepared by Olex 2 1.3 software<sup>S5</sup>. All non-hydrogen atoms were refined anisotropically. The H atoms attached to O atoms were located by differential Fourier analysis and refined with  $U_{\text{iso}}(\text{H})$  values of  $1.5U_{\text{eq}}(\text{O})$ . The positions of other H atoms were calculated geometrically and refined as riding, with  $U_{\text{iso}}(\text{H})$  values of  $1.2U_{\text{eq}}(\text{C})$ .

### **X-ray crystallography of 1·MeCyC<sub>6</sub> and 1·Tol**

Single crystals of 1·MeCyC<sub>6</sub> and 1·Tol suitable for single-crystal X-ray diffraction studies were formed. The crystals in the mother liquid were picked up with a pipette and dropped in paraton oil. The single crystals coated with oil were isolated on MicroMounts, and the crystals were immediately placed in a cold nitrogen stream. X-Ray diffraction data for 1·MeCyC<sub>6</sub>, 1·Bz, and 1·Tol were collected on a Rigaku XtaLAB P200 with graphite-monochromated Mo K $\alpha$  radiation. The structures were solved by direct methods using SHELXT (Version 2014)<sup>S3</sup> and refined using the full-matrix least-squares method on  $F^2$  using the SHELXL (Version 2014)<sup>S4</sup> Program. All materials for publication were prepared by Yadokari XG software<sup>S6,S7</sup>. All non-hydrogen atoms were refined anisotropically. The H atoms attached to O atoms were located by differential Fourier analysis and refined with  $U_{\text{iso}}(\text{H})$  values of  $1.5U_{\text{eq}}(\text{O})$ . The positions of other H atoms were calculated geometrically and refined as riding, with  $U_{\text{iso}}(\text{H})$  values of  $1.2U_{\text{eq}}(\text{C})$ .

**Refinement details of the crystal 1·Bz:** one propyl group of the 1 molecule and two Bz molecules were determined as disordered species. similarly, the number of Bz molecules was determined by the <sup>1</sup>H NMR spectrum (Fig. S13).

**Refinement details of the crystal 1·MeCyC<sub>6</sub>:** two propyl groups of the 1 molecule were determined to be disordered species. In addition, the crystal 1·MeCyC<sub>6</sub> retains the solvent electron density in the voids of the 3540 Å<sup>3</sup> / unit cell. The contribution of solvent electron density, 684 electrons, was removed by the SQUEEZE function<sup>S8</sup>. On the other hand, the solvent electron density in the voids was determined as MeCyC<sub>6</sub> molecules by the <sup>1</sup>H NMR spectrum (Fig. S14).

**Refinement details of the crystal 1·Tol:** two propyl groups of the 1 molecule were determined as disordered species. In addition, the crystal 1·Tol retained the solvent

electron density in the voids of the 3418 Å<sup>3</sup>/unit cell. The contribution of solvent electron density, 796 electrons, was removed by the SQUEEZE function<sup>S8</sup>. On the other hand, the solvent electron density in the voids was determined as Tol molecules by the <sup>1</sup>H NMR spectrum (Fig. S14).



## Crystallographic Data

**Table S1.** Experimental single-crystal X-ray data for **1·MeCyC<sub>6</sub>**, **1·Bz**, and **1·Tol**.

|                                                         | <b>1·MeCyC<sub>6</sub></b>                                                          | <b>1·Bz</b>                                                                   | <b>1·Tol</b>                                                                  |
|---------------------------------------------------------|-------------------------------------------------------------------------------------|-------------------------------------------------------------------------------|-------------------------------------------------------------------------------|
| Crystallization Solvent                                 | MeCyC <sub>6</sub> /CHCl <sub>3</sub><br>(=1:1)                                     | benzene                                                                       | toluene                                                                       |
| Collection Temperature (K)                              | 223                                                                                 | 223                                                                           | 223                                                                           |
| Formula                                                 | C <sub>40.41</sub> H <sub>44.82</sub> Br <sub>4</sub> O <sub>4</sub> S <sub>4</sub> | C <sub>42</sub> H <sub>42</sub> Br <sub>4</sub> O <sub>4</sub> S <sub>4</sub> | C <sub>43</sub> H <sub>44</sub> Br <sub>4</sub> O <sub>4</sub> S <sub>4</sub> |
| Formula Weight                                          | 1045.38                                                                             | 1058.63                                                                       | 1072.66                                                                       |
| Crystal System                                          | trigonal                                                                            | trigonal                                                                      | trigonal                                                                      |
| Space Group                                             | <i>R</i> $\bar{3}$ c                                                                | <i>R</i> $\bar{3}$ c                                                          | <i>R</i> $\bar{3}$ c                                                          |
| <i>a</i> [Å]                                            | 31.1921(6)                                                                          | 31.1234(3)                                                                    | 31.2941(5)                                                                    |
| <i>b</i> [Å]                                            | 31.1921(6)                                                                          | 31.1234(3)                                                                    | 31.2941(5)                                                                    |
| <i>c</i> [Å]                                            | 24.1196(5)                                                                          | 24.1605(2)                                                                    | 24.1681(4)                                                                    |
| $\alpha$ [°]                                            | 90                                                                                  | 90                                                                            | 90                                                                            |
| $\beta$ [°]                                             | 90                                                                                  | 90                                                                            | 90                                                                            |
| $\gamma$ [°]                                            | 120                                                                                 | 120                                                                           | 120                                                                           |
| <i>V</i> [Å <sup>3</sup> ]                              | 20323.1(9)                                                                          | 20268.0(4)                                                                    | 20497.4(7)                                                                    |
| <i>Z</i>                                                | 18                                                                                  | 18                                                                            | 18                                                                            |
| <i>D</i> <sub>calcd</sub> [g cm <sup>-3</sup> ]         | 1.533                                                                               | 1.561                                                                         | 1.564                                                                         |
| <i>F</i> (000)                                          | 9419                                                                                | 9540                                                                          | 9684                                                                          |
| $\theta$ <sub>max</sub> [°]                             | 26.1960                                                                             | 76.7030                                                                       | 28.6690                                                                       |
| Reflections collected /<br>unique                       | 84595/28801<br>[ <i>R</i> <sub>int</sub> = 0.0637]                                  | 22078 / 11899<br>[ <i>R</i> <sub>int</sub> = 0.0439]                          | 92214 / 26301<br>[ <i>R</i> <sub>int</sub> = 0.0473]                          |
| Data / restraints / parameter                           | 28801 / 38 / 249                                                                    | 11899 / 245 / 337                                                             | 26301 / 72 / 274                                                              |
| Final <i>R</i> indices [ <i>I</i> > 2σ ( <i>I</i> )]    | <i>R</i> 1 = 0.0423<br><i>wR</i> 2 = 0.0894                                         | <i>R</i> 1 = 0.0563<br><i>wR</i> 2 = 0.1540                                   | <i>R</i> 1 = 0.0449<br><i>wR</i> 2 = 0.1041                                   |
| <i>R</i> indices (all data)                             | <i>R</i> 1 = 0.0646<br><i>wR</i> 2 = 0.0984                                         | <i>R</i> 1 = 0.0612<br><i>wR</i> 2 = 0.1584                                   | <i>R</i> 1 = 0.0693<br><i>wR</i> 2 = 0.1177                                   |
| Good-of-fit on <i>F</i> <sup>2</sup>                    | 1.026                                                                               | 1.032                                                                         | 1.029                                                                         |
| Largest different peak and<br>hole [e.Å <sup>-3</sup> ] | 0.630 and -0.418                                                                    | 1.043 and -0.550                                                              | 0.733 and -0.430                                                              |
| CCDC                                                    | 2212208                                                                             | 2212209                                                                       | 2212210                                                                       |

## **Vapor sorption measurement of the activated crystal **1a** toward cyclohexane, methylcyclohexane, benzene, and toluene**

**Pre-treatment:** Before vapor adsorption measurement, the activated crystal **1a** has been pretreated at 100°C at  $< 10^{-3}$  Torr for 1 day for **1** just before use by the installed equipment of a BELSORP 18 automated gas adsorption apparatus. The two cyclic aliphatics, cyclohexane and methylcyclohexane, were treated with CaH<sub>2</sub> to remove water as an impurity component, followed by distillation at N<sub>2</sub> atmosphere, and were stored by using molecular sieves 3A. The two aromatics, benzene and toluene, were treated with Na to remove water as an impurity component, followed by distillation in N<sub>2</sub> atmosphere, and were stored by using molecular sieves 3A.

**Vapor adsorption measurement:** Adsorption measurement of **1a** for the two aliphatic and two aromatic vapors was conducted by using the BELSORP 18 automated gas adsorption apparatus. The activated crystal **1a** was placed in the sample chamber (ca. 15 mL) and maintained at  $25.0 \pm 0.1^\circ\text{C}$ . The larger gas chamber (176.36 mL) with a pressure gauge was kept at  $50 \pm 0.1^\circ\text{C}$ . Helium gas at certain pressure was introduced into the gas chamber and was allowed to diffuse into the sample chamber by opening a valve. The change in pressure allowed an accurate determination of the volume of the total gas phase. Host-guest complexation was monitored similarly by using a guest vapor in place of helium. The amount of guest adsorbed was calculated readily from the pressure difference ( $P_{\text{cal}} - P$ ), where,  $P_{\text{cal}}$  is the calculated pressure if there were no guest adsorption, as in the case of helium, and  $P$  is the observed equilibrium pressure, as which the change in pressure in 500 s had become smaller than 1 % of the pressure at the point. All operations were computer-controlled and automatic.

## **Thermogravimetric analysis (TGA)**

Thermogravimetric analysis (TGA) was performed on a HITACHI STA7300 apparatus in the temperature range between 24 and 500 °C under a N<sub>2</sub> atmosphere at a heating rate of 10 °C min<sup>-1</sup>.

### **Gas chromatography with the head-space method**

Gas chromatography (GC) analysis was performed on a Shimadzu GC-2010 Plus instrument with a DB-624 column (0.53 mm ID × 30 m, 0.3 μm) using the head-space method (a PerkinElmer TurboMatrix HS 40). The oven was set at 40 °C and ramped up at 10 °C min<sup>-1</sup> increments to 240 °C and maintained for 10 min. The total run time was 60 min. The injection temperature was 140 °C, and the detection temperature was 250 °C. The flow rate (line velocity) was 35 cm sec<sup>-1</sup> with helium as the carrier gas.

### **Refinement of powder X-ray diffraction (PXRD) patterns for the 1 $\alpha$ -adsorbed MeCyC<sub>6</sub>, Bz, Tol, CyC<sub>6</sub>/Bz, and MeCyC<sub>6</sub>/Tol vapors using Le Bail fit**

The PXRD patterns of the 1 $\alpha$ -adsorbed MeCyC<sub>6</sub>, Bz, Tol, CyC<sub>6</sub>/Bz, and MeCyC<sub>6</sub>/Tol vapors were refined using the Le Bail method<sup>S9</sup> using RIETAN-FP software<sup>S10</sup>. The simulated PXRD patterns of the single-crystal X-ray structures of 1·MeCyC<sub>6</sub>, 1·Bz, and 1·Tol matched the measured PXRD patterns. Therefore, the lattice constants obtained from the single crystal X-ray structure analyses of 1·MeCyC<sub>6</sub>, 1·Bz, and 1·Tol were employed in the Le Bail fit. For the refinement of PXRD patterns after 1 $\alpha$  adsorbed MeCyC<sub>6</sub>, Bz, and Tol, the lattice constants of the corresponding single crystals were used as initial values. In contrast, for the refinement of PXRD patterns after 1 $\alpha$  adsorbed CyC<sub>6</sub>/Bz or MeCyC<sub>6</sub>/Tol, the lattice constants of single-crystal X-ray structures of 1·Bz or 1·Tol were used as initial values. In this fit, the refinement of each PXRD pattern was performed by pattern-fitting the lattice constant or the zero-point shift while keeping one

value fixed and varying the other. The final unit cell parameters, along with the residual values of  $R_p$  and  $R_{wp}$ , were refined (Fig. S15 – S19).

## 2. Supporting figures

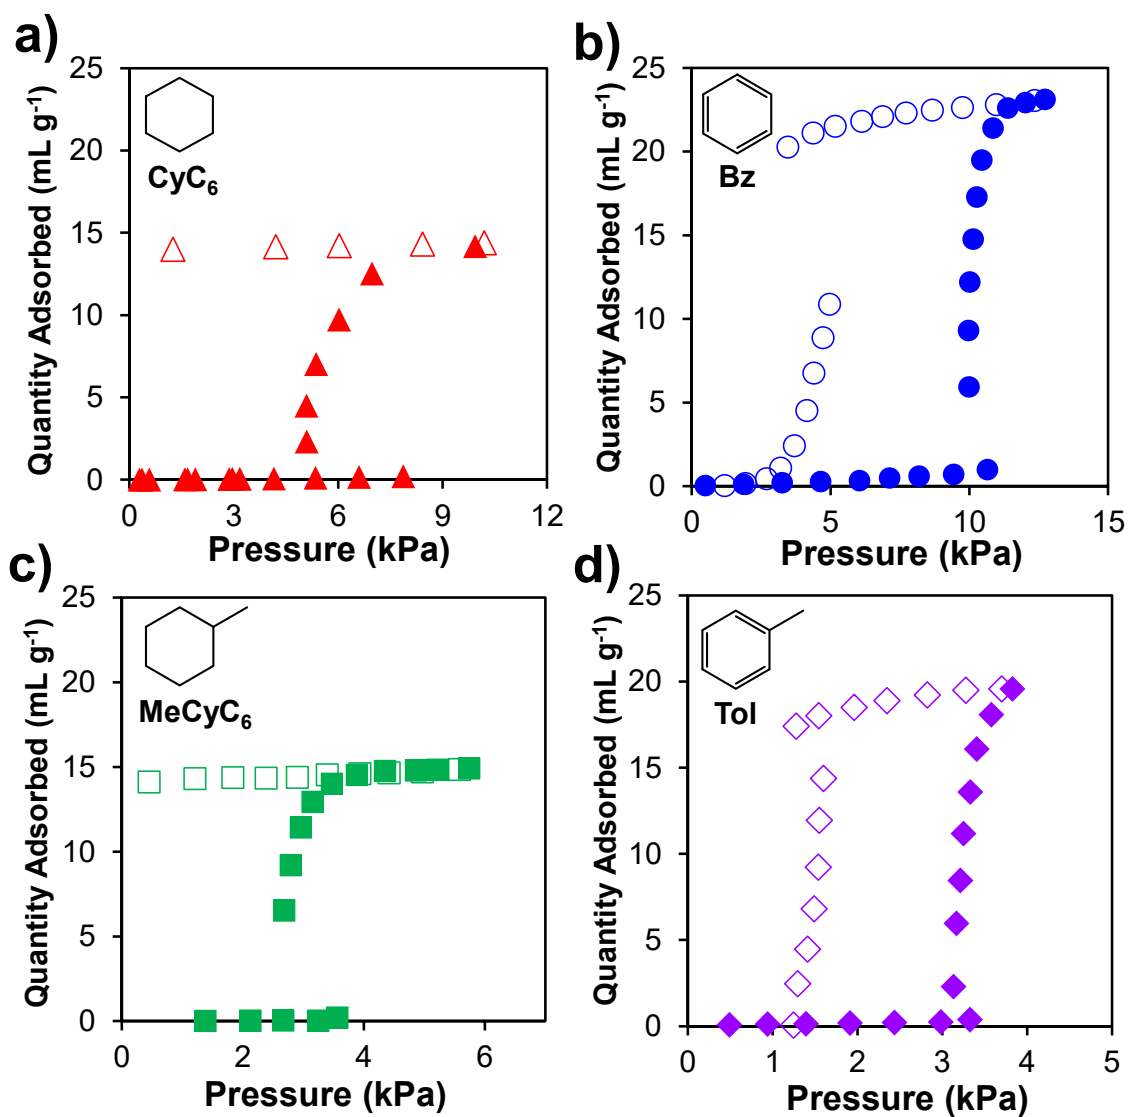

**Fig. S1** Vapor sorption isotherms of **1a** at 25 °C in a) CyC<sub>6</sub>, b) Bz, c) MeCyC<sub>6</sub>, and d) Tol vapor. Solid symbols: sorption; open symbols: desorption.

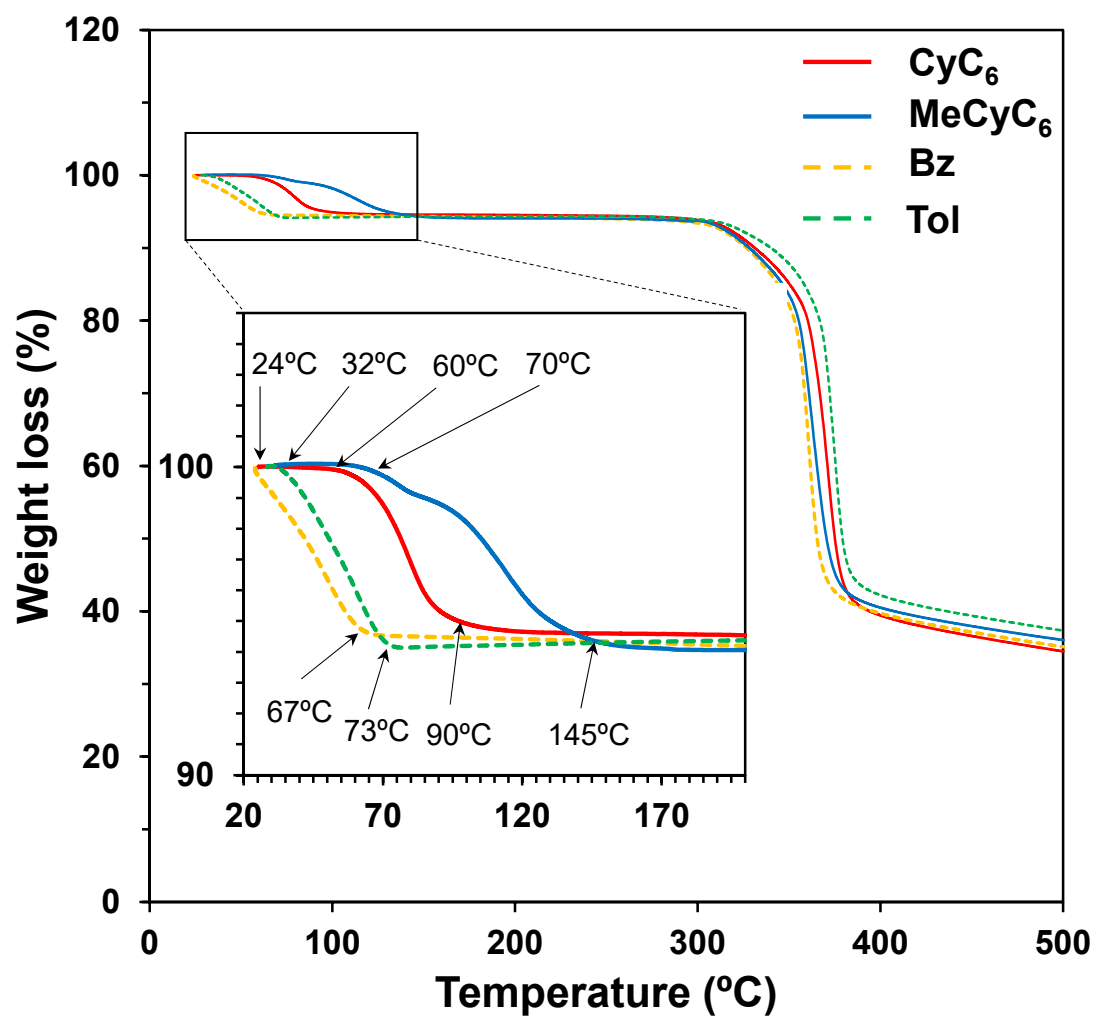

**Fig. S2** Thermogravimetric analysis (TGA) of the **1a**-adsorbed CyC<sub>6</sub> (red line), MeCyC<sub>6</sub> (blue line), Bz (yellow dotted line), and Tol (green dotted line).

## Sorption Experiment in Vials

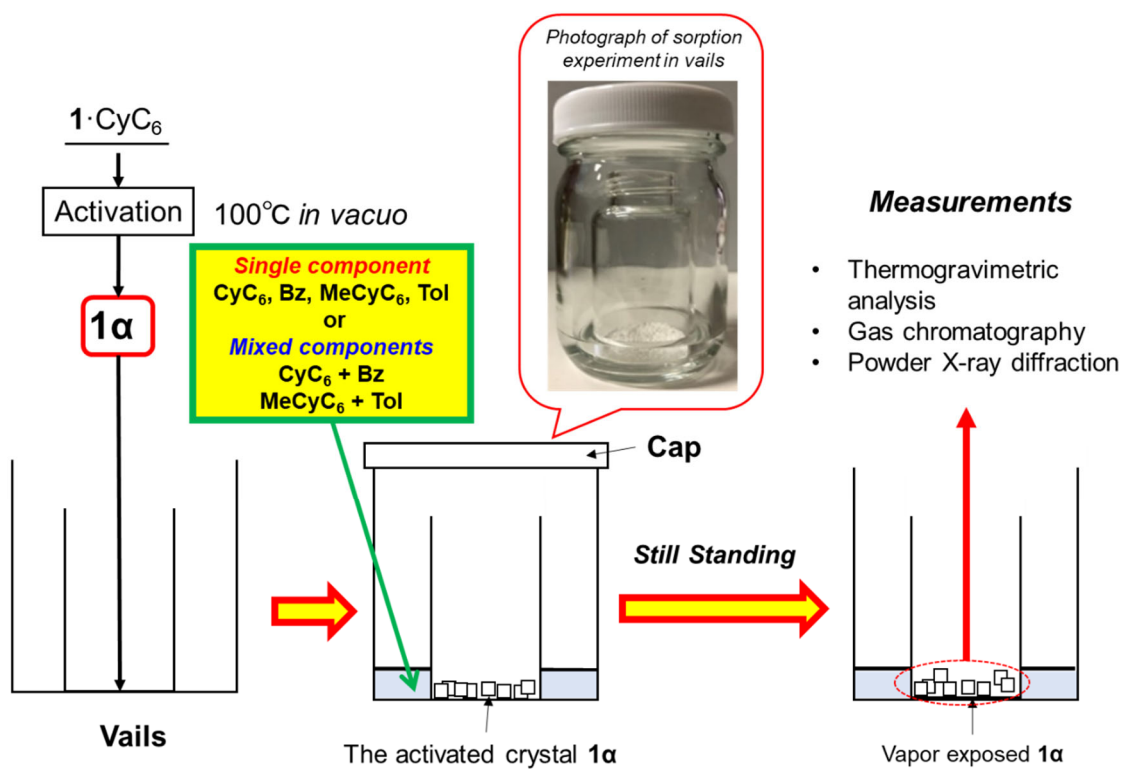

**Fig. S3** Vapor sorption experiments of activated crystal **1α** for single or two components of cyclic aliphatics and aromatics in vials.

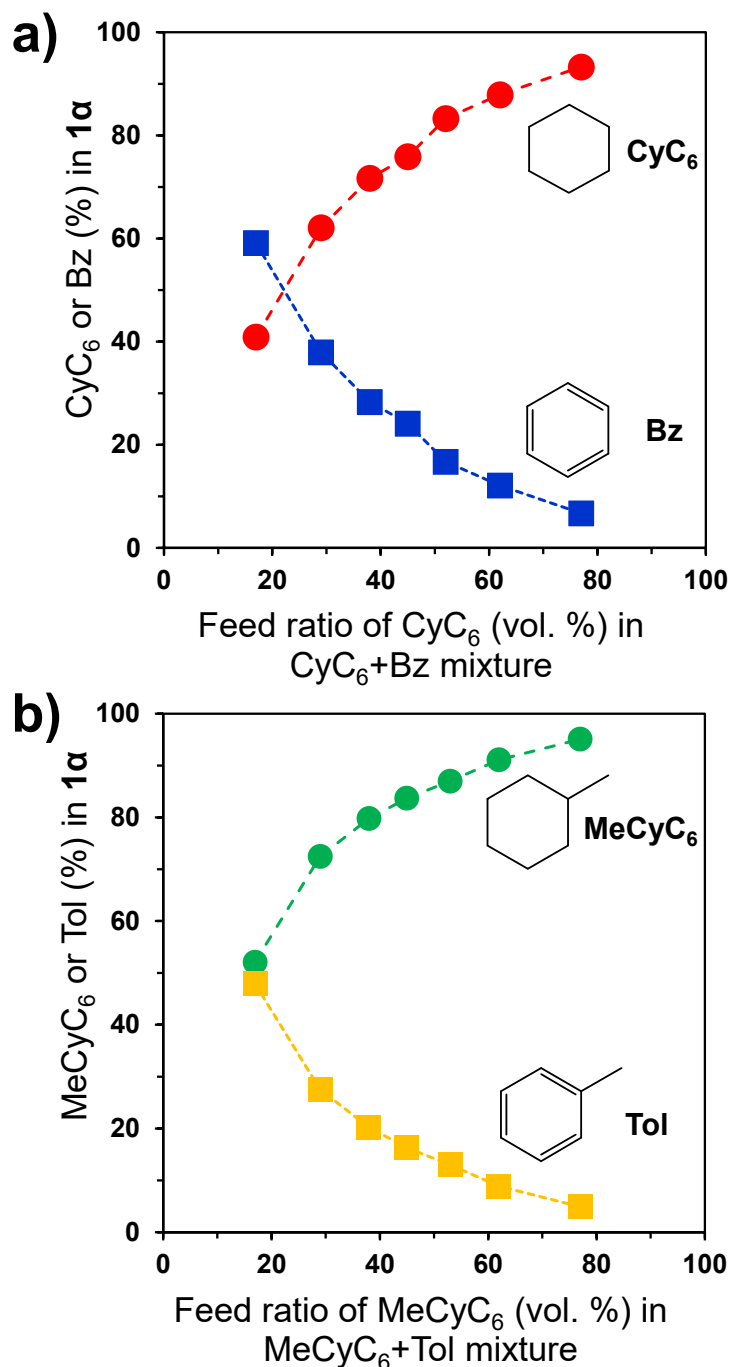

**Fig. S4** Head-space gas chromatography of the adsorption ratio (%) of a) CyC<sub>6</sub>/Bz or b) MeCyC<sub>6</sub>/Tol in **1α** exposed to a CyC<sub>6</sub>/Bz or MeCyC<sub>6</sub>/Tol mixed system at various compositions 1:4–1:0.25 (v/v) for 48 h

The results of head-space GC measurements indicated that the adsorbed amounts of CyC<sub>6</sub> and MeCyC<sub>6</sub> in **1α** range from 40.9 % to 93.3 % and from 52.1 % to 95.1 %, respectively. In contrast, the adsorbed quantities of aromatic hydrocarbons decreased, and the amounts of the adsorbed Bz and Tol ranged from 59.1 % to 6.7 % and from 47.9 % to 4.9 %, respectively.



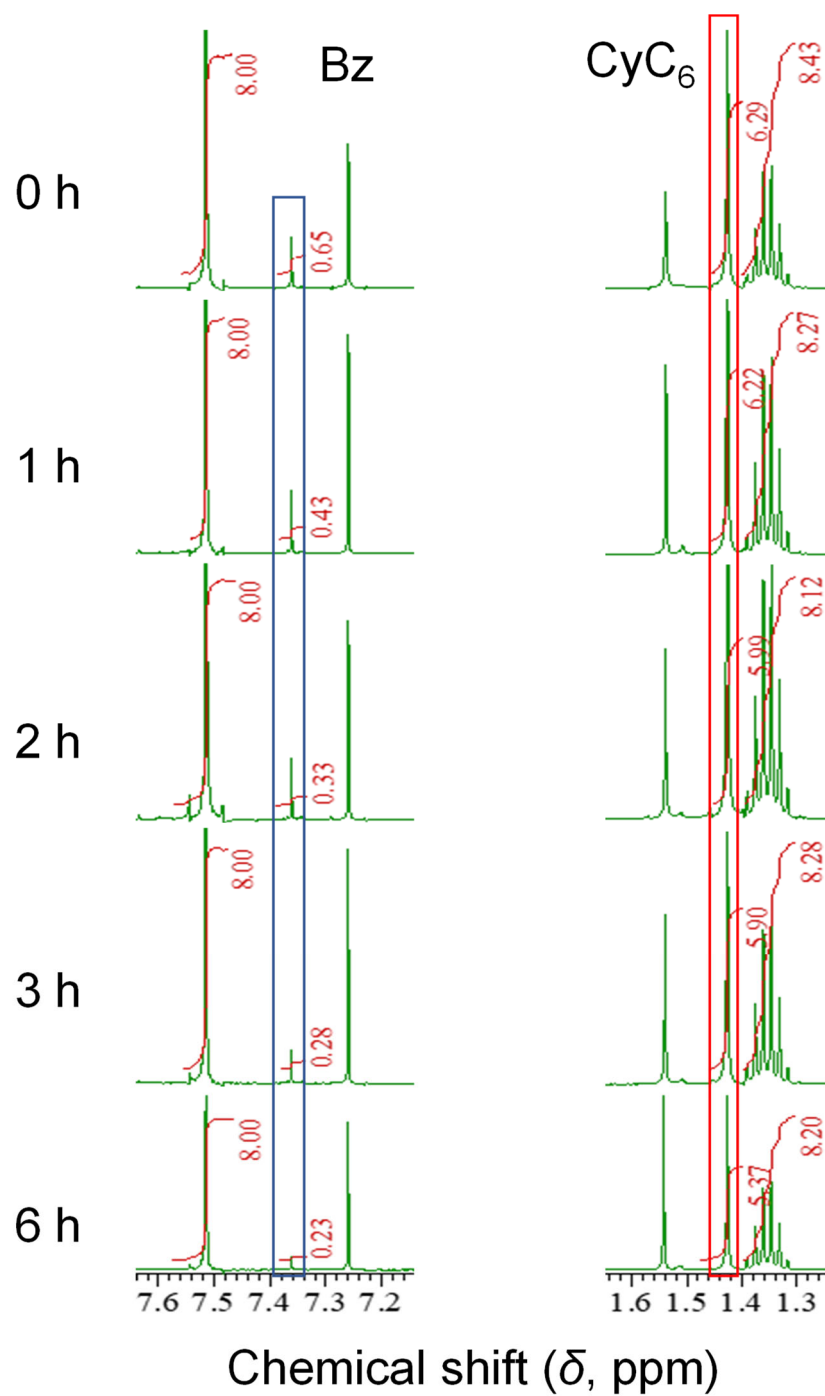

**Fig. S5** <sup>1</sup>H NMR spectra of **1a** incorporating CyC<sub>6</sub> and Bz after a) 0 h, b) 1 h, c) 2 h, d) 3 h, and e) 6 h of air aging.

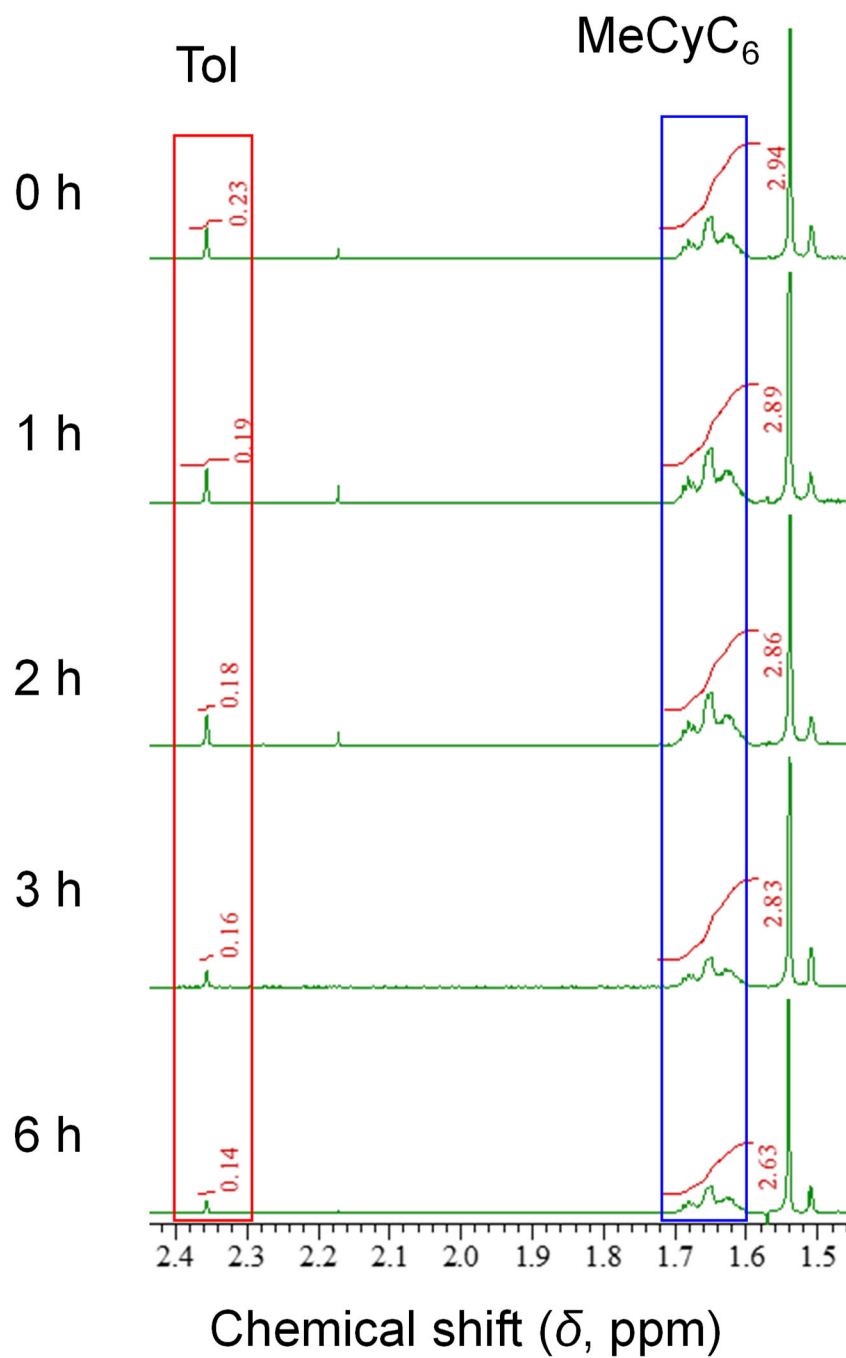

**Fig. S6** <sup>1</sup>H NMR spectra of **1a** incorporating MeCyC<sub>6</sub> and Tol after a) 0 h, b) 1 h, c) 2 h, d) 3 h, and e) 6 h of air aging.

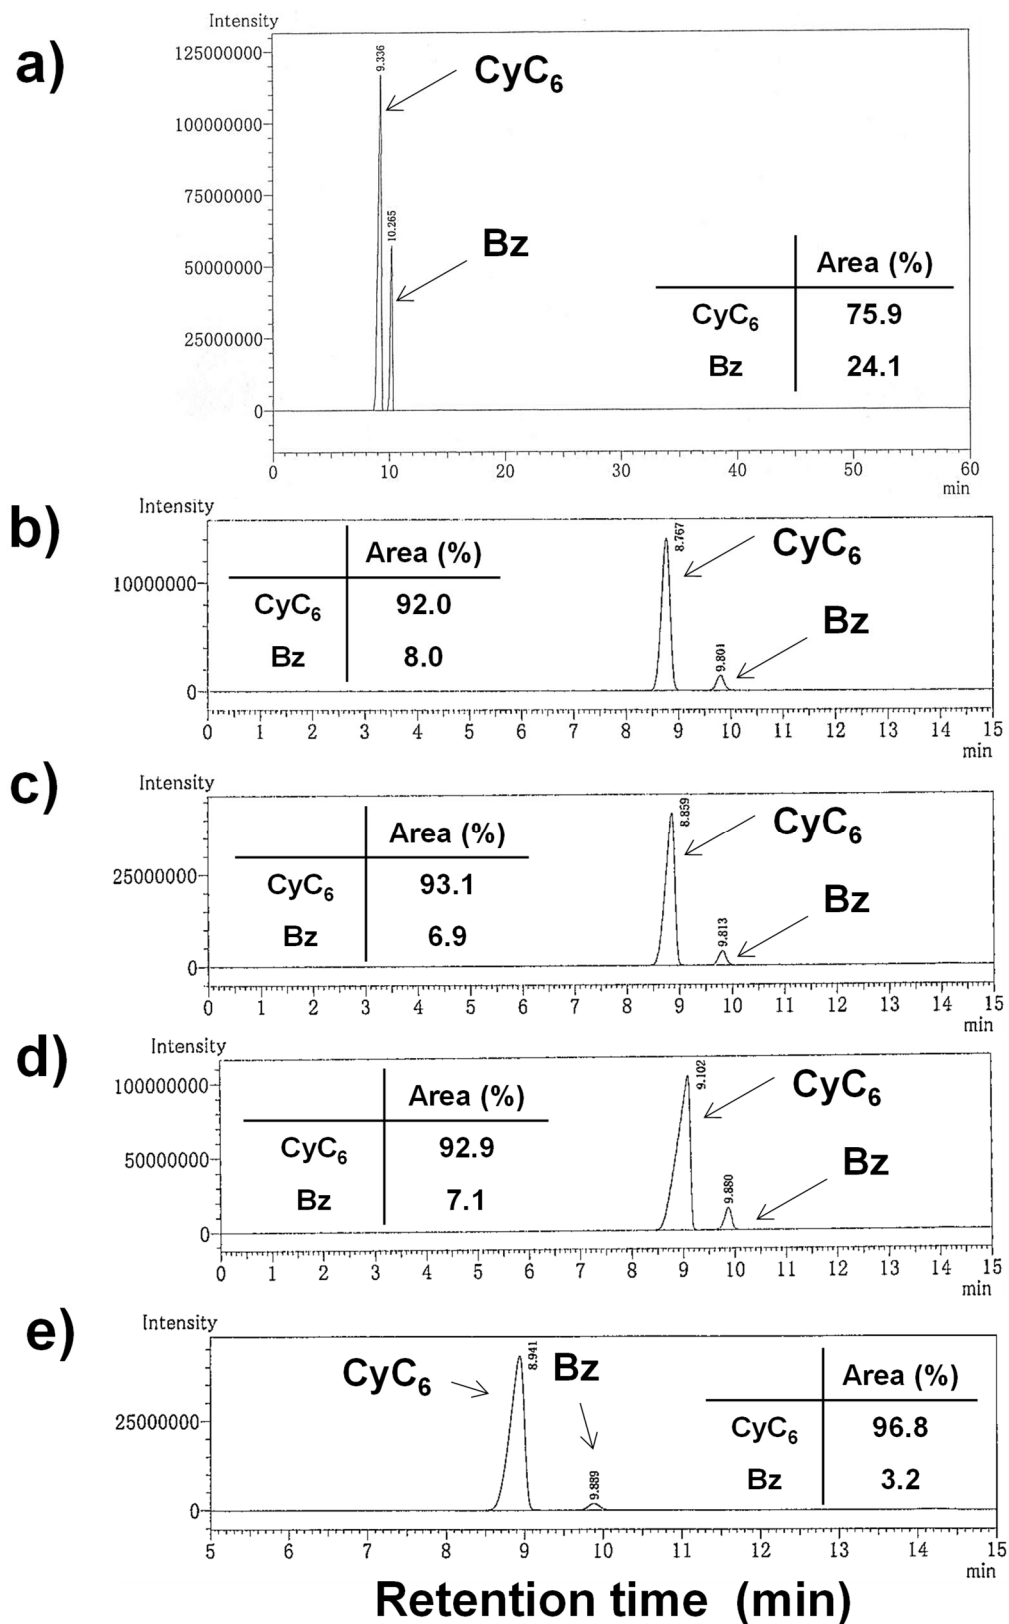

**Fig. S7** Preliminary data of head-space gas chromatograms of the remaining ratio of CyC<sub>6</sub> and Bz in **1a** after a) 0 h, b) 1 h, c) 2 h, d) 3 h, and e) 6 h of air aging.

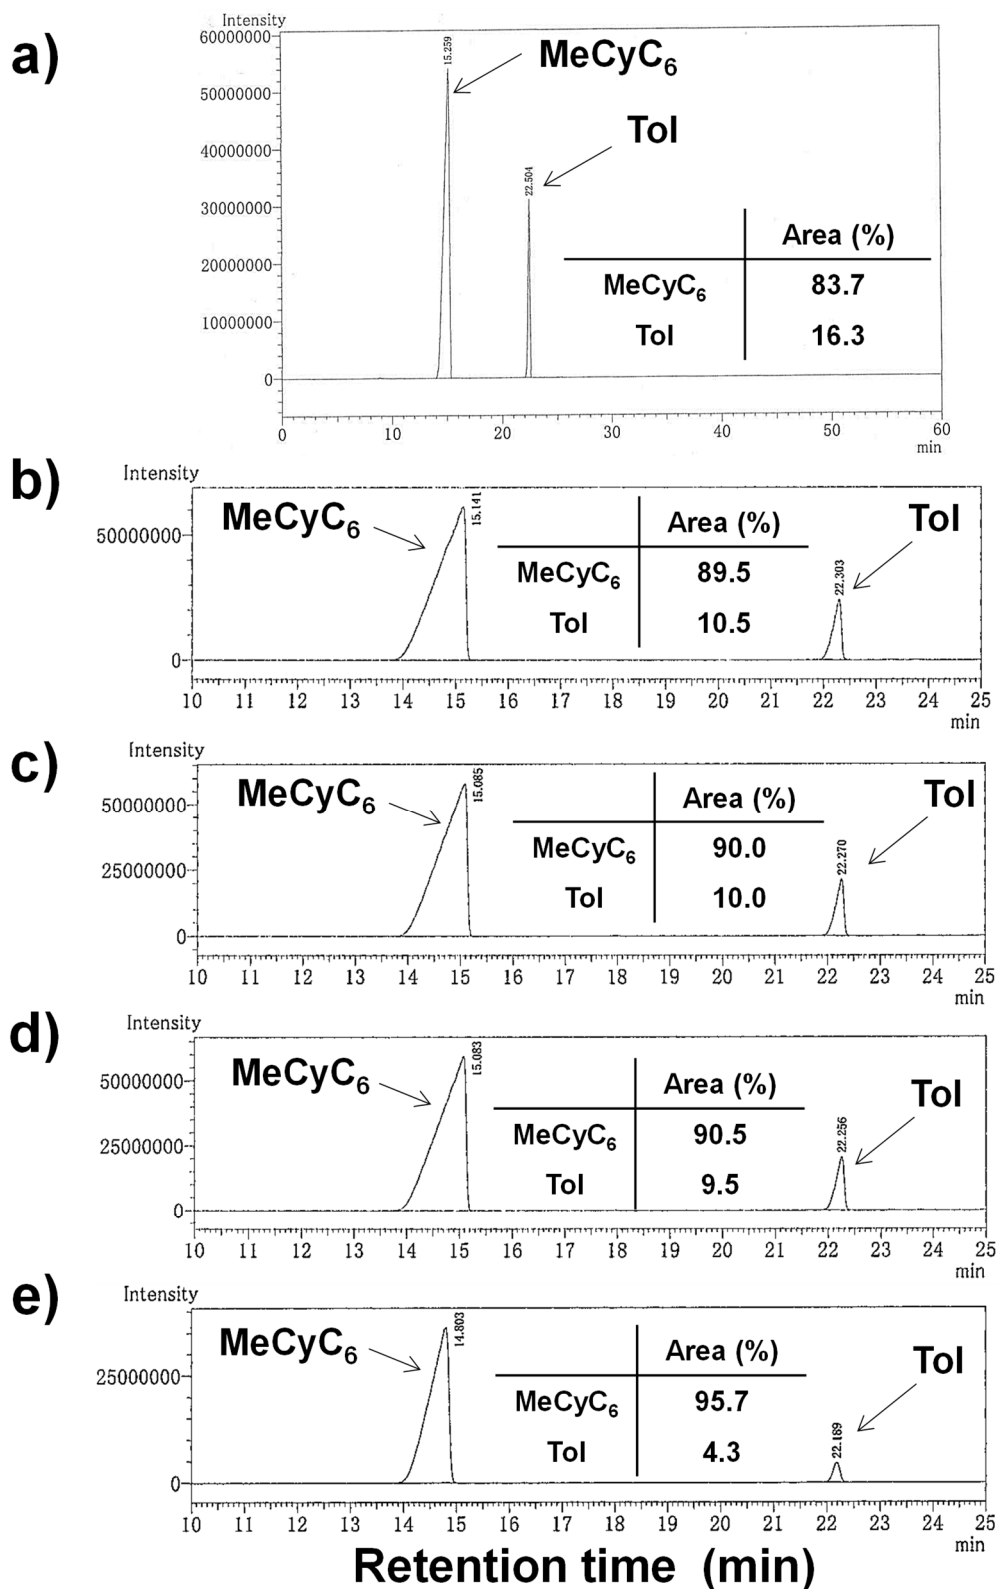

**Fig. S8** Preliminary data of head-space gas chromatograms of the remaining ratio of MeCyC<sub>6</sub> and Tol in **1a** after a) 0 h, b) 1 h, c) 2 h, d) 3 h, and e) 6 h of air aging.

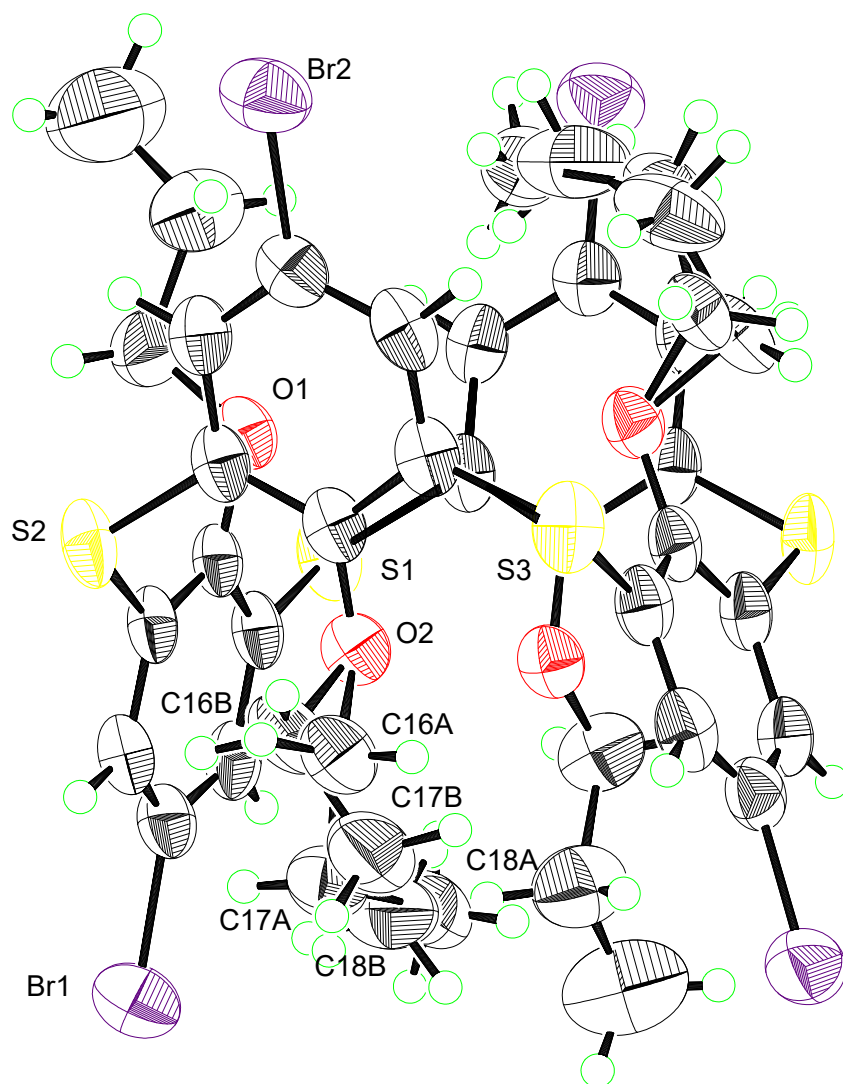

**Fig. S9** ORTEP diagram of **1·MeCyC<sub>6</sub>** with thermal ellipsoids at 50 % probability. Color code: bromine (purple), sulfur (yellow), oxygen (red), carbon (black), and hydrogen (light green).

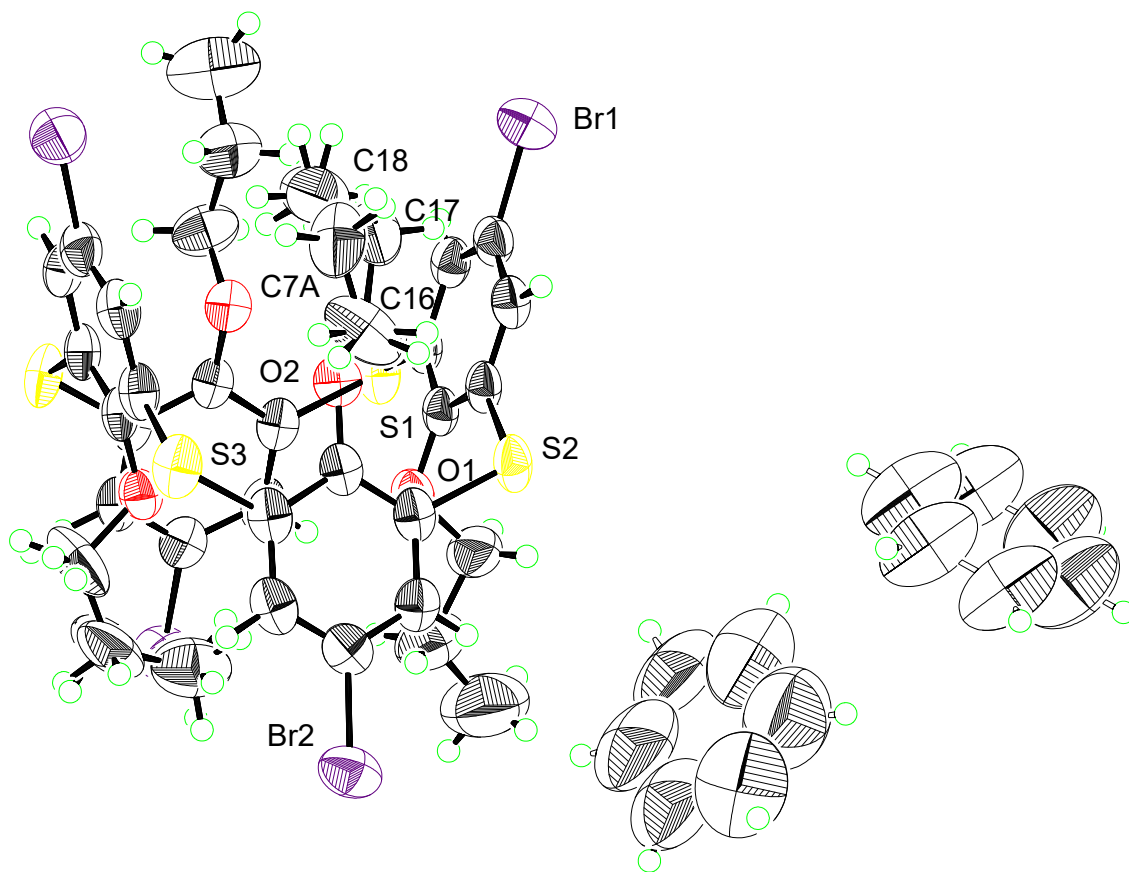

**Fig. S10** ORTEP diagram of 1·Bz with thermal ellipsoids at 50 % probability. Color code: bromine (purple), sulfur (yellow), oxygen (red), carbon (black), and hydrogen (light green).

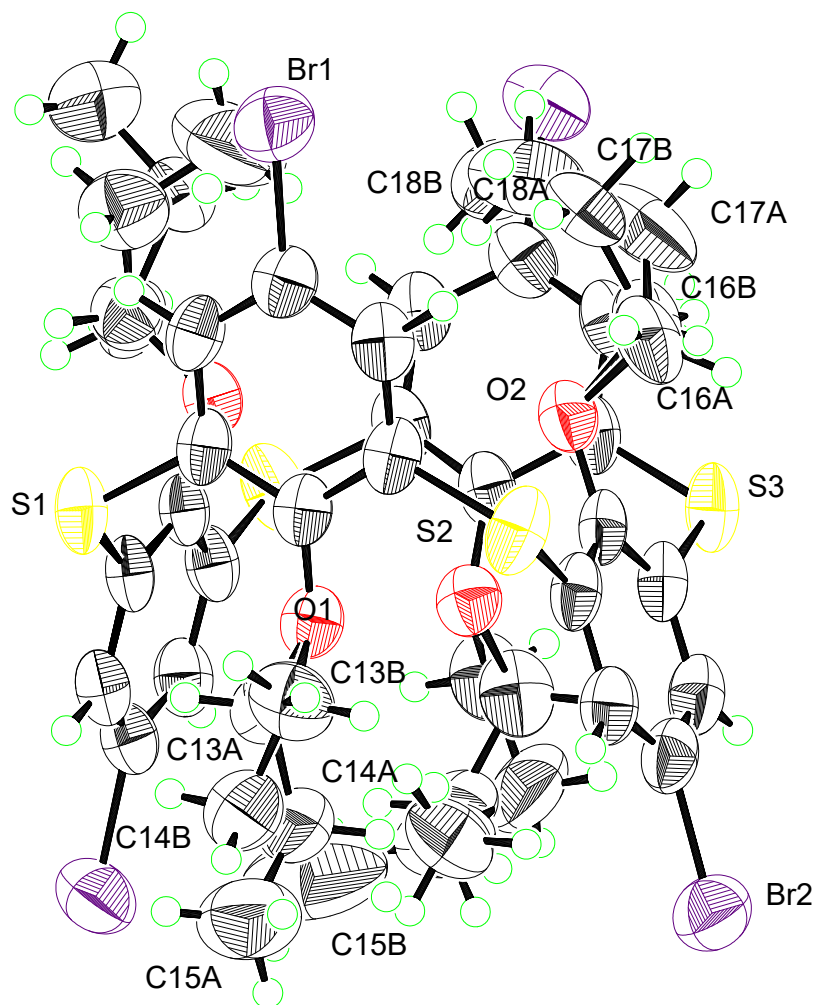

**Fig. S11** ORTEP diagram of **1·Tol** with thermal ellipsoids at 50 % probability. Color code: bromine (purple), sulfur (yellow), oxygen (red), carbon (black), and hydrogen (light green).

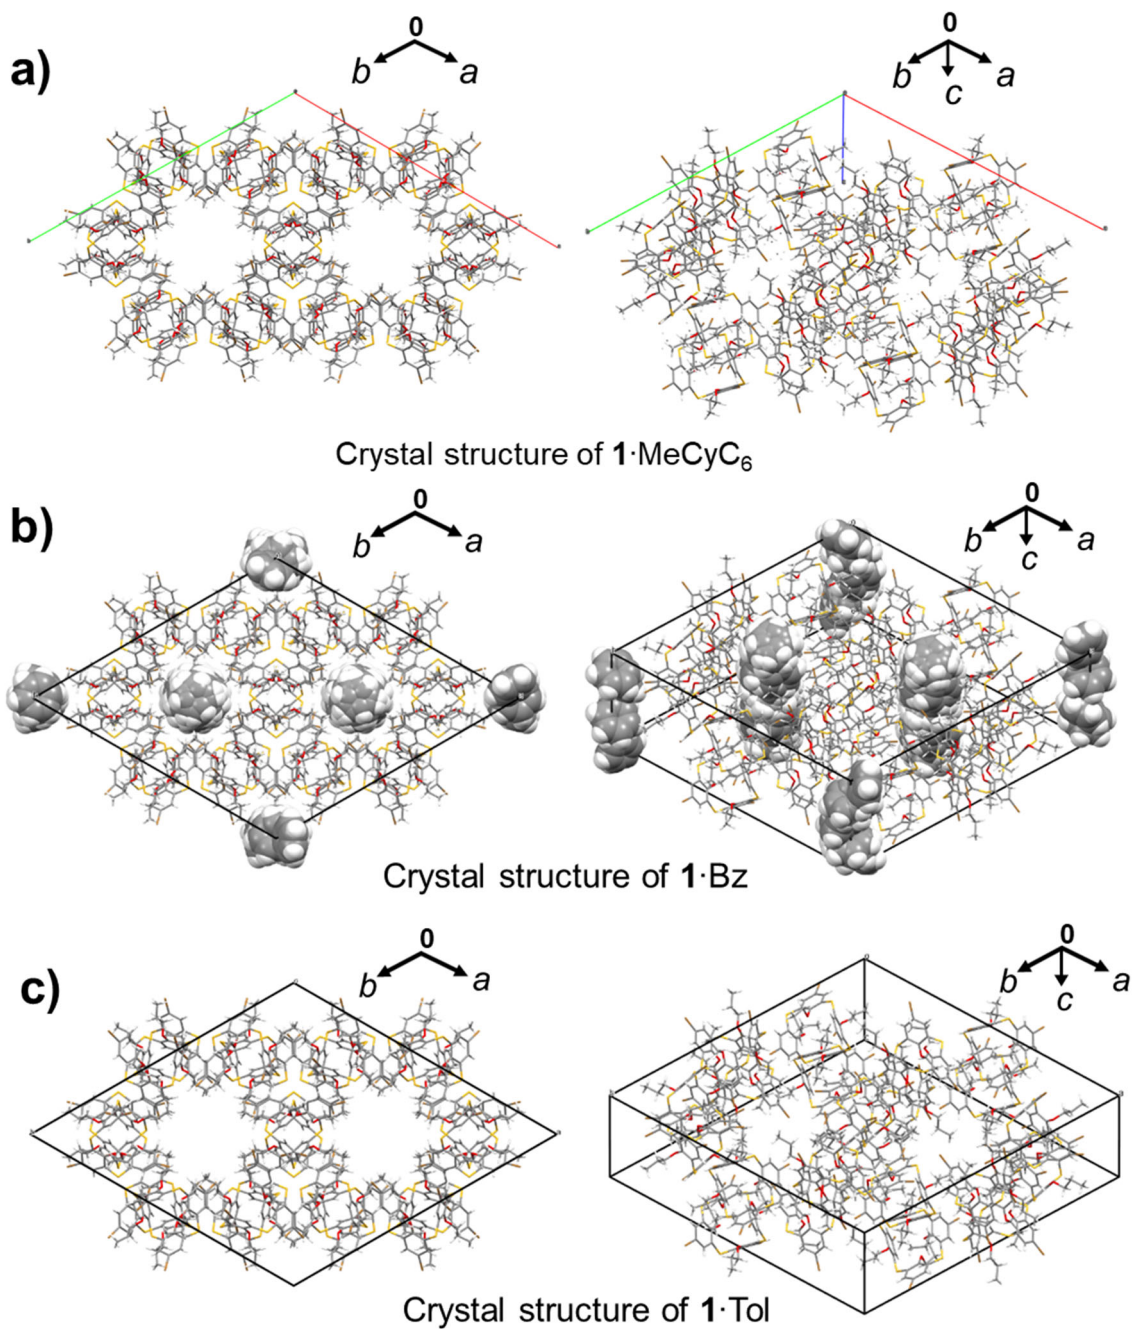

**Fig. S12** Extended crystal structures of a) **1·MeCyC<sub>6</sub>**, b) **1·Bz**, and c) **1·Tol**. These crystal structures were similar to the structure of **1·CyC<sub>6</sub>** (trigonal space group  $R\bar{3}c$ ) reported in our previous work.<sup>S1,S2</sup> Color code: bromine (brown), sulfur (yellow), oxygen (red), carbon (dark gray), and hydrogen (light gray). Bz molecules in the crystal structure of **1·Bz** are shown as space-filling models.



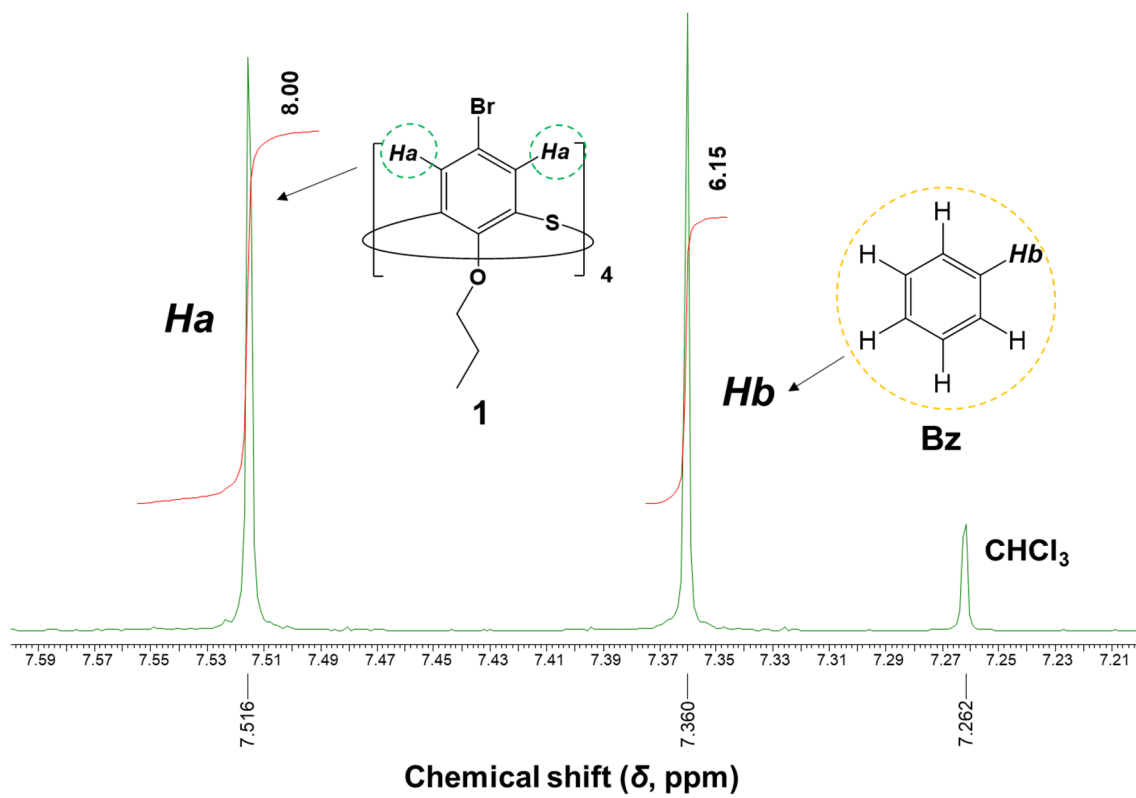

**Fig. S13**  $^1\text{H}$  NMR spectrum of the crystal  $1 \cdot \text{Bz}$  dissolved in chloroform- $d_1$  ( $\text{CDCl}_3$ ,  $\delta$  from TMS).

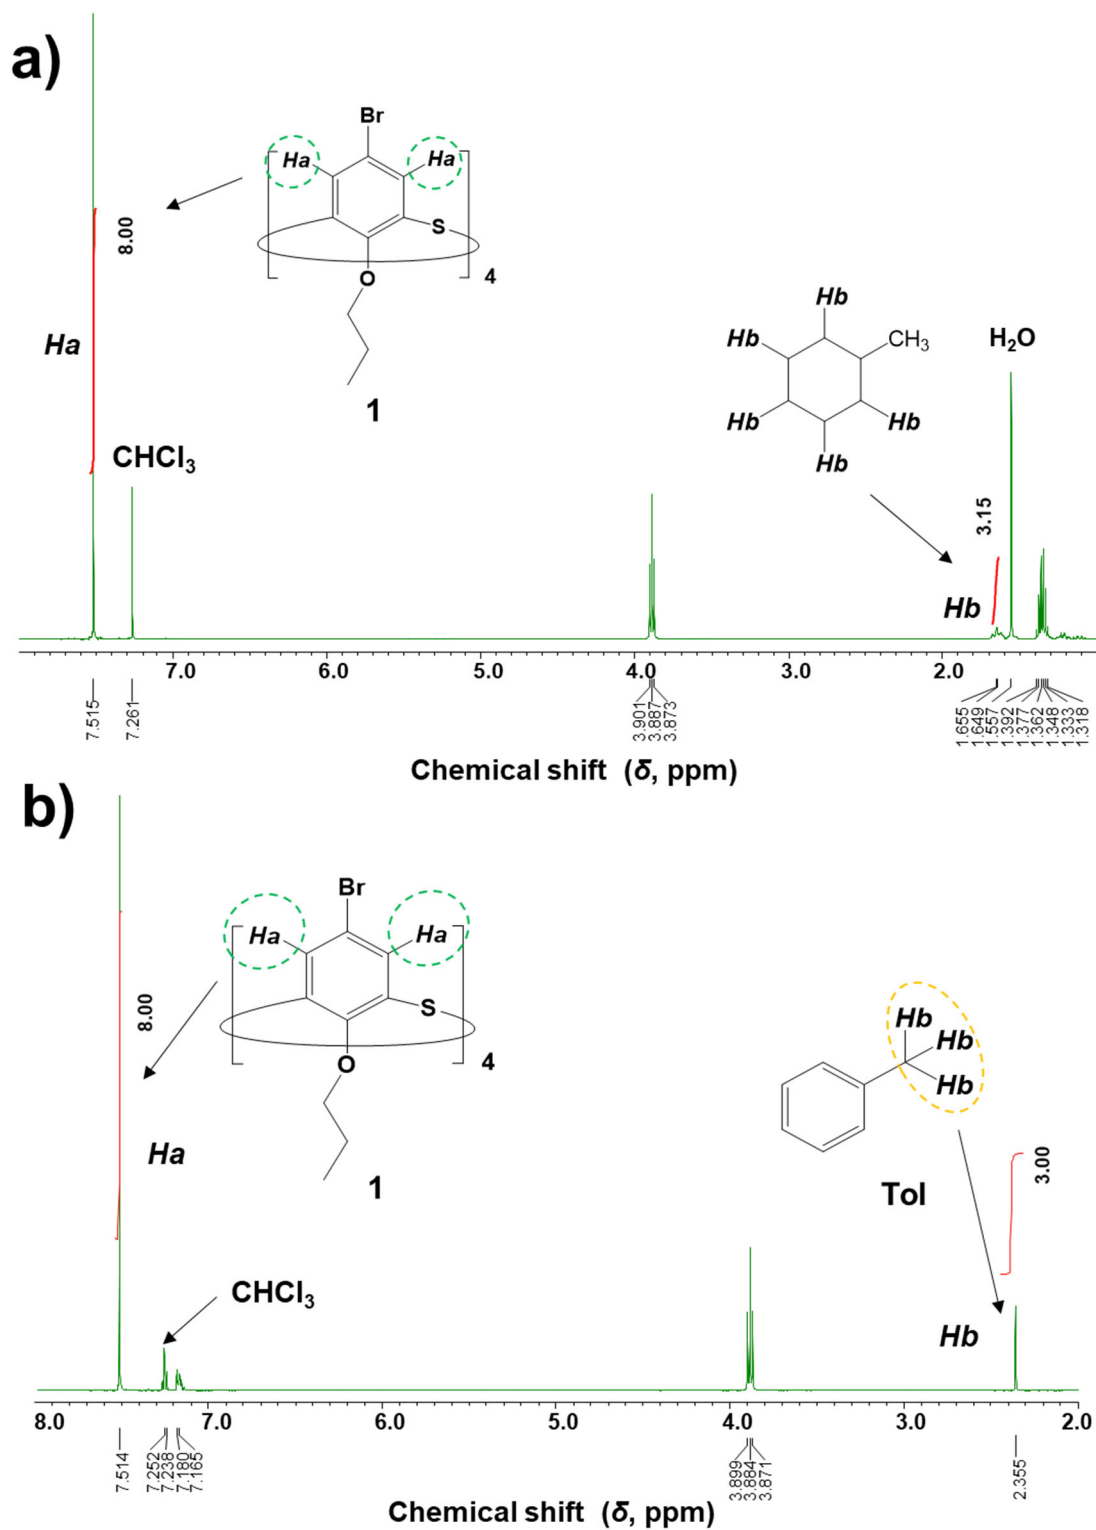

**Fig. S14**  $^1\text{H}$  NMR spectrum of the crystal a) 1-MeCyC<sub>6</sub> and b) 1-Tol dissolved in chloroform-*d*<sub>1</sub> (500 MHz, CDCl<sub>3</sub>,  $\delta$  from TMS).

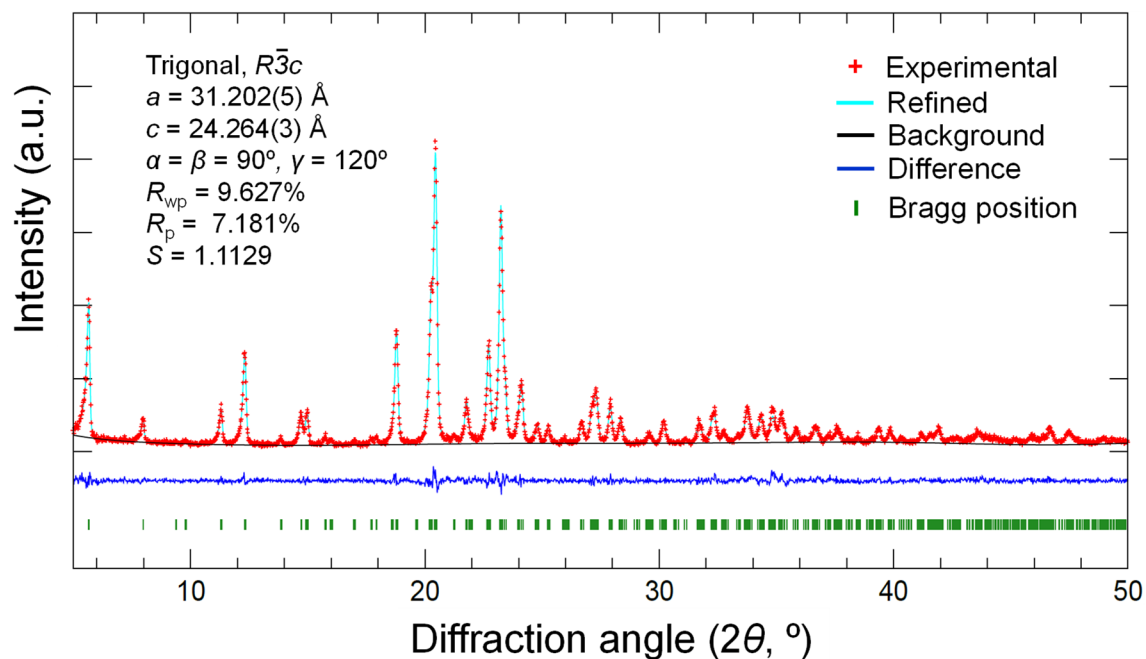

**Fig. S15** Le Bail fit for the **1 $\alpha$** -adsorbed MeCyC<sub>6</sub> against the experimental powder X-ray diffraction (PXRD) pattern. The red crosses represent the experimental pattern, and the pale blue line represents the refined fit. The background (black), difference plot (blue), and Bragg position (green) are also displayed.

Comparison of the lattice constants of the refined PXRD pattern with those of a single crystal of **1**·MeCyC<sub>6</sub>:

Lattice constants of the refined PXRD pattern

$$a = 31.202(5) \text{ \AA}, c = 24.264(3) \text{ \AA}, \alpha = \beta = 90^\circ, \gamma = 120^\circ$$

Lattice constants of a single crystal of **1**·MeCyC<sub>6</sub>

$$a = b = 31.1921(6) \text{ \AA}, c = 24.1196(5) \text{ \AA}, \alpha = \beta = 90^\circ, \gamma = 120^\circ$$

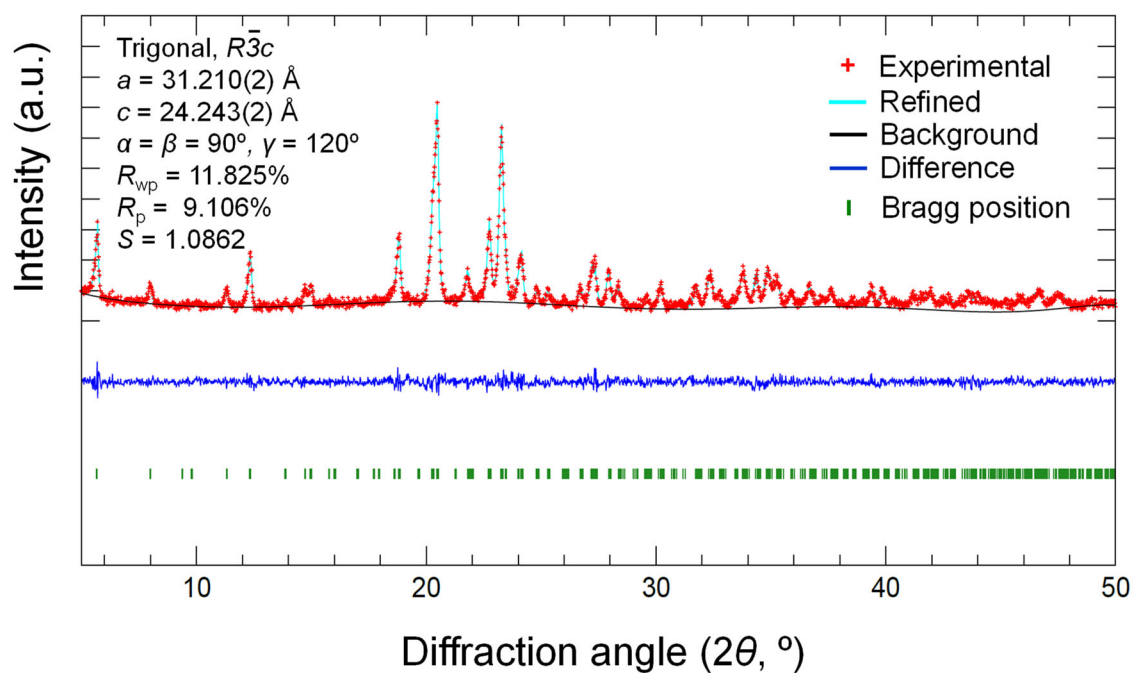

**Fig. S16** Le Bail fit for the **1 $\alpha$** -adsorbed Bz against the experimental powder X-ray diffraction (PXRD) pattern. The red crosses represent the experimental pattern, and the pale blue line represents the refined fit. The background (black), difference plot (blue), and Bragg position (green) are also displayed.

Comparison of the lattice constants of the refined PXRD pattern with those of a single crystal of **1**·Bz:

Lattice constants of the refined PXRD pattern

$$a = 31.210(2) \text{ \AA}, c = 24.232(2) \text{ \AA}, \alpha = \beta = 90^\circ, \gamma = 120^\circ$$

Lattice constants of a single crystal of **1**·Bz

$$a = b = 31.1234(3) \text{ \AA}, c = 24.1605(2) \text{ \AA}, \alpha = \beta = 90^\circ, \gamma = 120^\circ$$

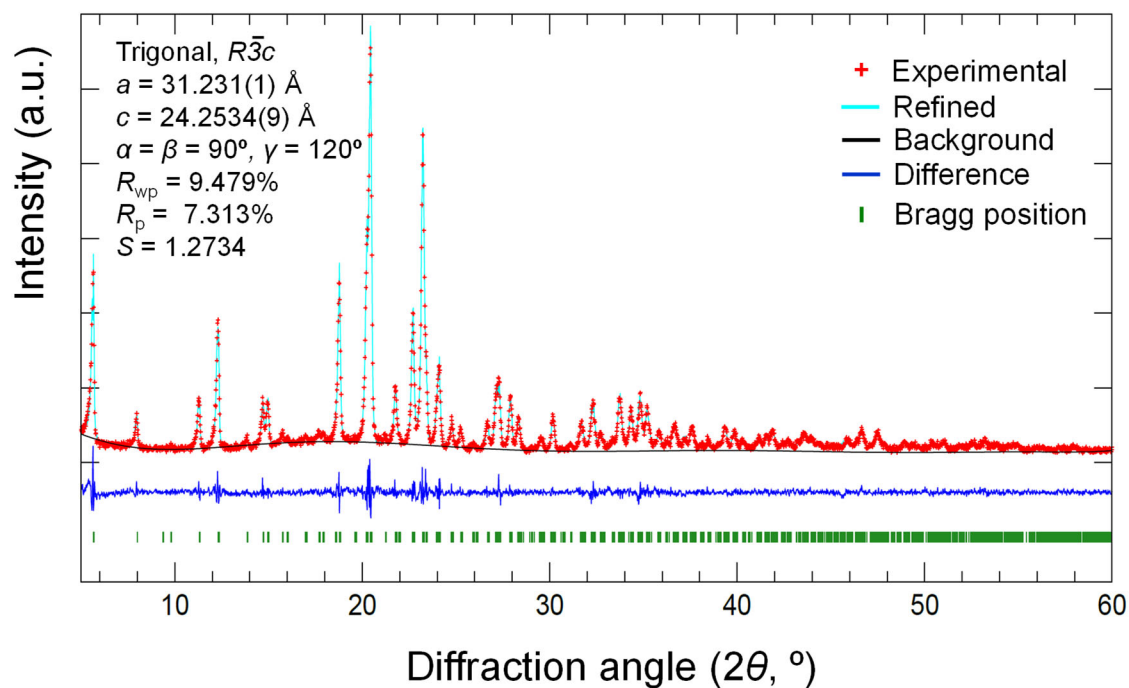

**Fig. S17** Le Bail fit for the **1 $\alpha$** -adsorbed Tol against the experimental powder X-ray diffraction (PXRD) pattern. The red crosses represent the experimental pattern, and the pale blue line represents the refined fit. The background (black), difference plot (blue), and Bragg position (green) are also displayed.

Comparison of the lattice constants of the refined PXRD pattern with those of a single crystal of **1**·Tol:

Lattice constants of the refined PXRD pattern

$$a = 31.286(2) \text{ \AA}, c = 24.228(1) \text{ \AA}, \alpha = \beta = 90^\circ, \gamma = 120^\circ$$

Lattice constants of a single crystal of **1**·Tol

$$a = b = 31.2941(5) \text{ \AA}, c = 24.1681(4) \text{ \AA}, \alpha = \beta = 90^\circ, \gamma = 120^\circ$$

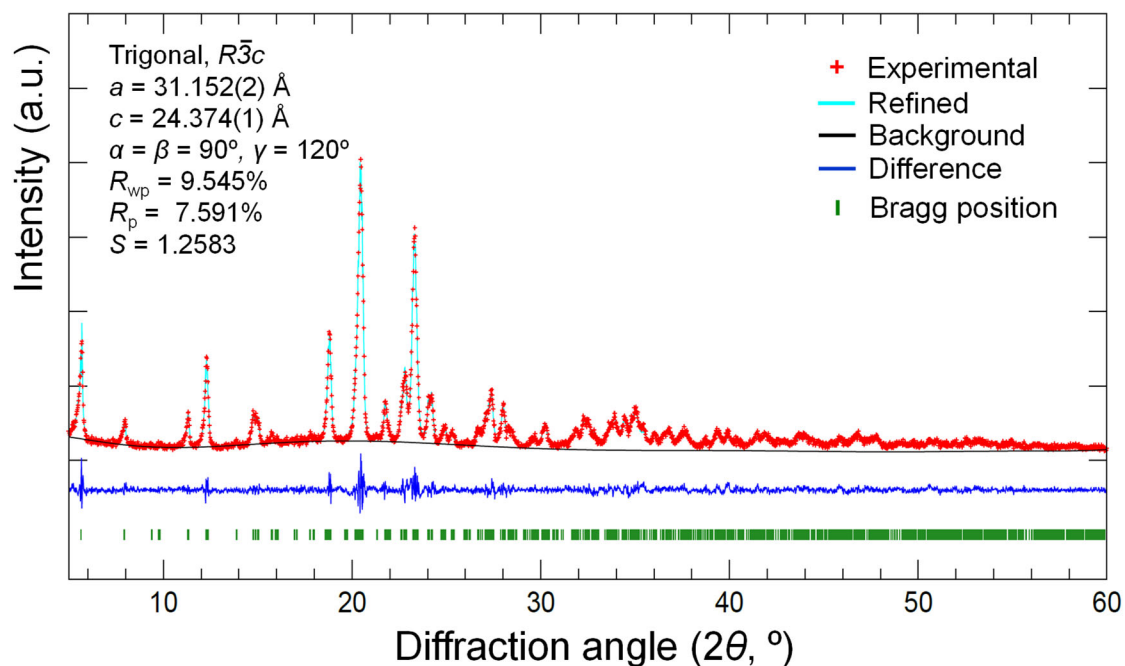

**Fig. S18** Le Bail fit for the **1 $\alpha$** -adsorbed CyC<sub>6</sub>/Bz against the experimental powder X-ray diffraction (PXRD) pattern. The red crosses represent the experimental pattern, and the pale blue line represents the refined fit. The background (black), difference plot (blue), and Bragg position (green) are also displayed.

Comparison of the lattice constants of the refined PXRD pattern with those of a single crystal of **1**·Bz:

Lattice constants of the refined PXRD pattern

$$a = 31.152(2) \text{ \AA}, c = 24.374(1) \text{ \AA}, \alpha = \beta = 90^\circ, \gamma = 120^\circ$$

Lattice constants of a single crystal of **1**·Bz

$$a = b = 31.1234(3) \text{ \AA}, c = 24.1605(2) \text{ \AA}, \alpha = \beta = 90^\circ, \gamma = 120^\circ$$

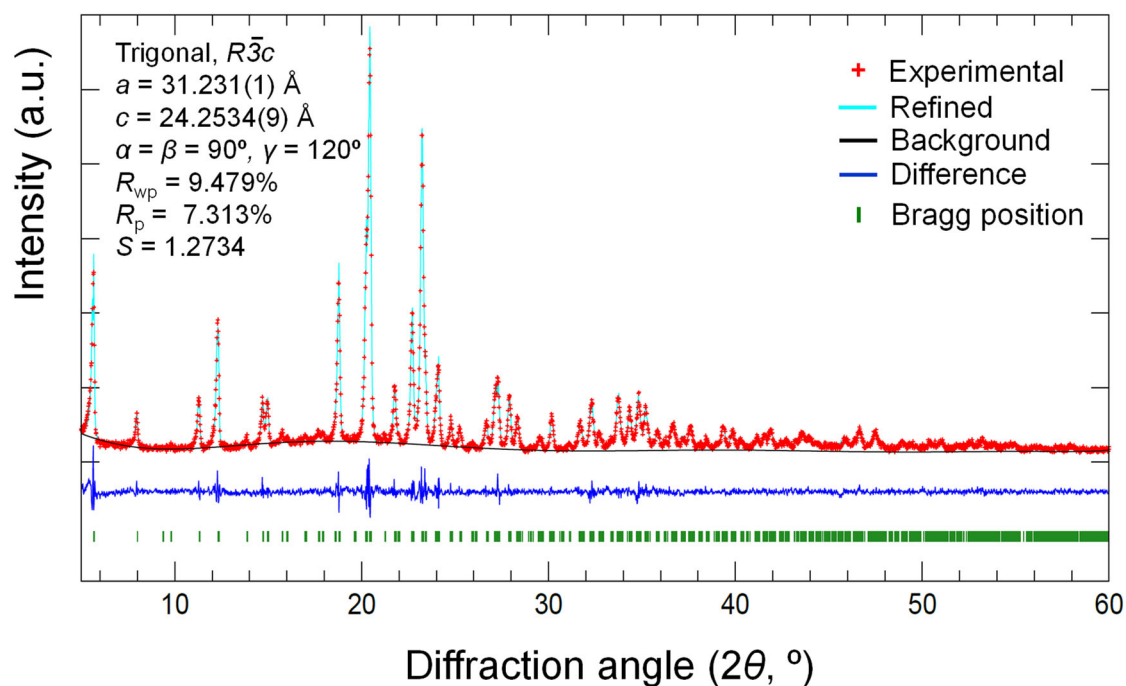

**Fig. S19** Le Bail fit for the **1 $\alpha$** -adsorbed MeCyC<sub>6</sub>/Tol against the experimental powder X-ray diffraction (PXRD) pattern. The red crosses represent the experimental pattern, and the pale blue line represents the refined fit. The background (black), difference plot (blue), and Bragg position (green) are also displayed.

Comparison of the lattice constants of the refined PXRD pattern with those of a single crystal of **1**·Tol:

Lattice constants of the refined PXRD pattern

$$a = 31.231(1) \text{ \AA}, c = 24.2534(9) \text{ \AA}, \alpha = \beta = 90^\circ, \gamma = 120^\circ$$

Lattice constants of a single crystal of **1**·Tol

$$a = b = 31.2941(5) \text{ \AA}, c = 24.1681(4) \text{ \AA}, \alpha = \beta = 90^\circ, \gamma = 120^\circ$$

### 3. References

- S1 F. Hamada, M. Yamada, Y. Kondo, S. Ito and U. Akiba, *CrystEngComm*, **2011**, *13*, 6920-6923.
- S2 M. Yamada, F. Uemura, U. M. R. Kunda, T. Tanno, H. Katagiri and F. Hamada, *Chem. Eur. J.* **2020**, *26*, 8393–8399.
- S3 G. M. Sheldrick, *Acta Cryst.* **2015**, *A71*, 3–8.
- S4 G. M. Sheldrick, *Acta Cryst.* **2015**, *C71*, 3–8
- S5 O. V. Dolomanov, L. J. Bourhis, R. J. Gildea, J. A. K. Howard, H. Puschmann, *J. Appl. Cryst.* **2009**, *42*, 339-341
- S6 K. Wakita, Yadokari-XG, *Software for Crystal Structure Analyses*, **2001**.
- S7 C. Kabuto, S. Akine, T. Nemoto and E. Kwon, *J. Cryst. Soc. Jpn.* **2009**, *51*, 218–224.
- S8 A. L. Speck, *Acta Cryst.* **2015**, *C71*, 9–18
- S9 A. Le Bail, H. Duroy and J. L. Fourquet, *Mater. Res. Bull.* **1988**, *23*, 447–452.
- S10 F. Izumi and K. Momma, *Solid State Phenom.*, **2007**, *130*, 15–20.
